# Supplementary material for: Triboelectric Charging Properties of the Functional Groups of Common Pharmaceutical Materials Using Density Functional Theory Calculations
Source: MDPI journal article supplement (doi:10.3390/pharmaceutics16030433), 2024-03-21
Supplement: s1 [file s1]

# Triboelectric Charging Properties of the Functional Groups of Common Pharmaceutical Materials Using Density Functional Theory Calculations

James R. Middleton, Mojtaba Ghadiri and Andrew J. Scott

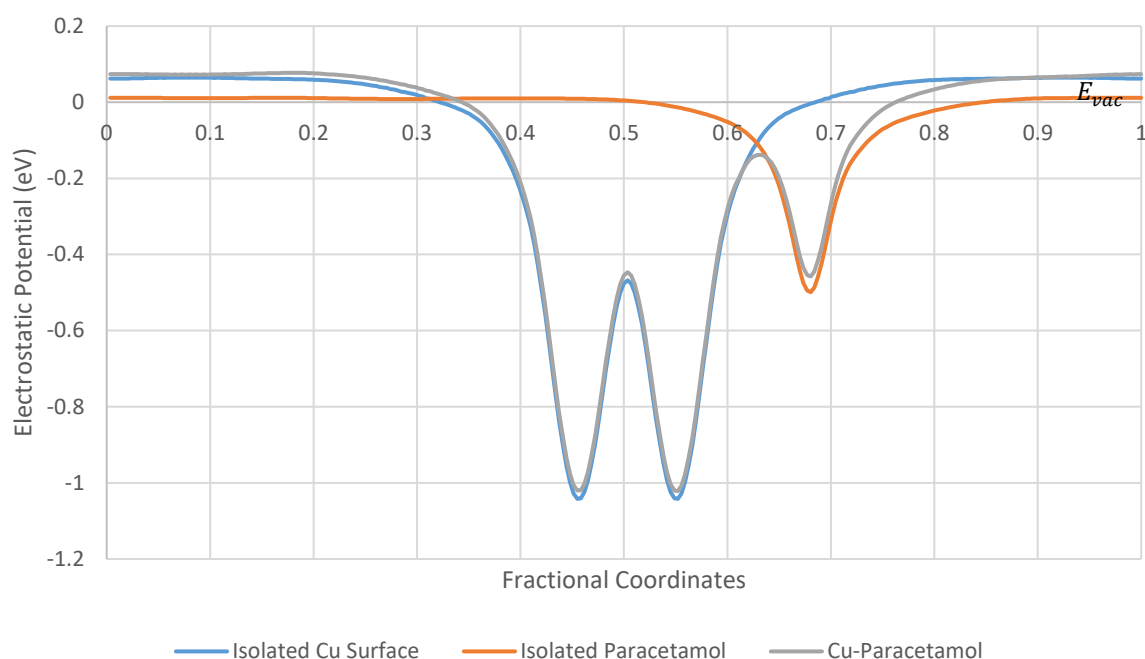

**Figure S1.** – Electrostatic potential of a copper (111) surface with a single paracetamol placed on its surface at its structurally optimised position. Electrostatic potential of the isolated surface and isolated molecule also shown.

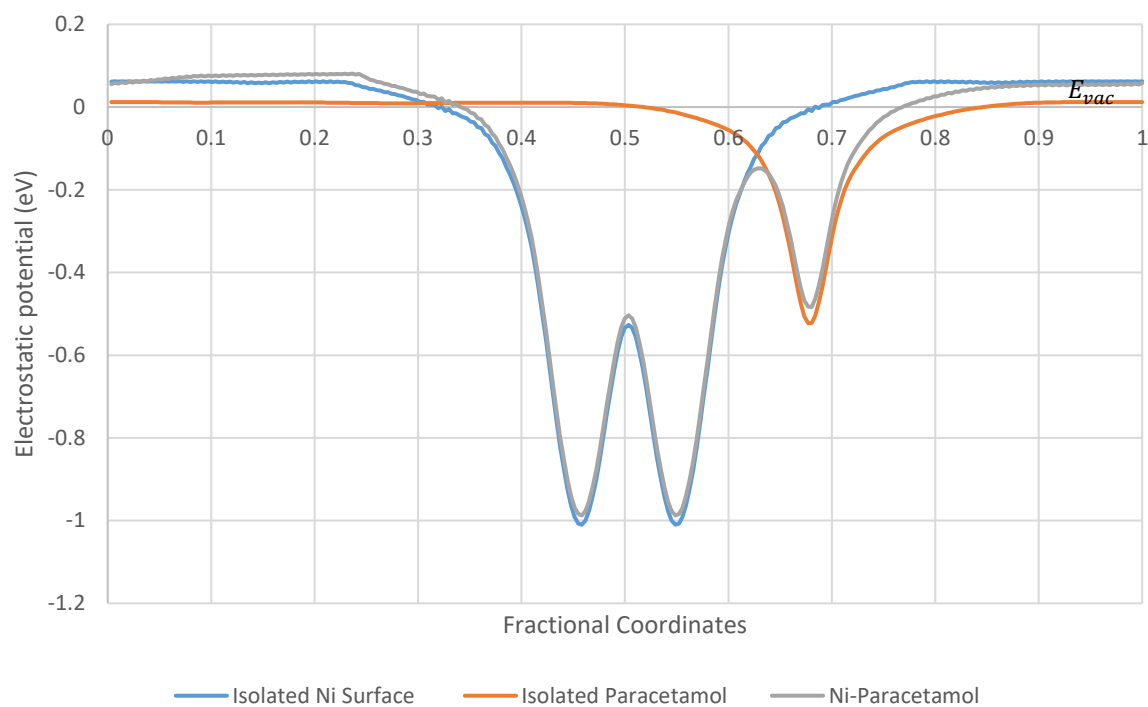

**Figure S2.** – Electrostatic potential of a nickel (111) surface with a single paracetamol placed on its surface at its structurally optimised position. Electrostatic potential of the isolated surface and isolated molecule also shown.

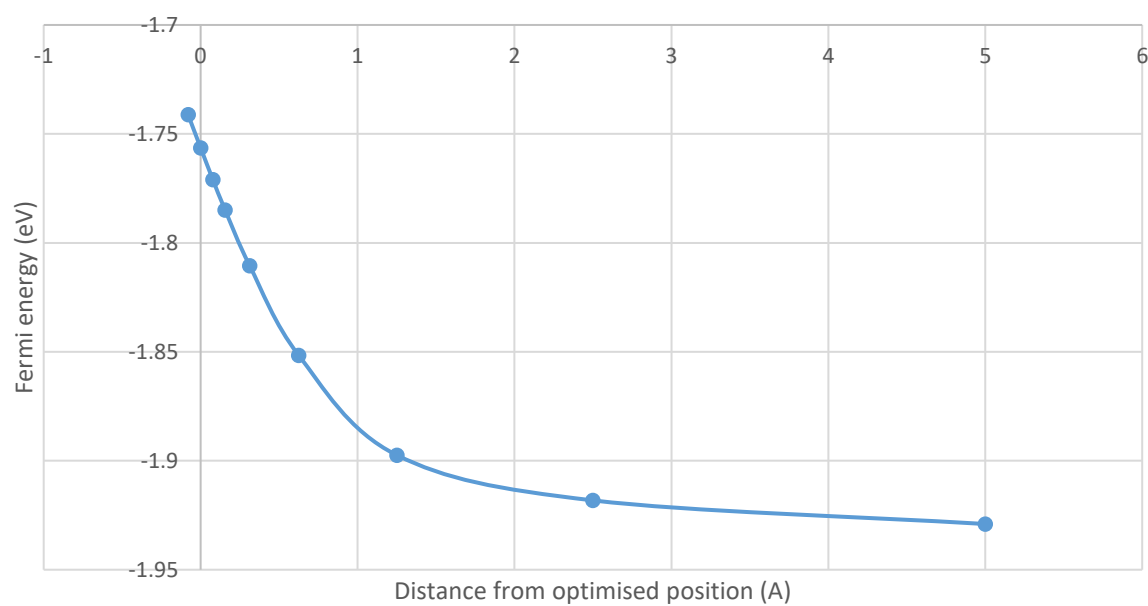

**Figure S3.** – The impact of the distance from the optimised position of the paracetamol molecule on the surface of the aluminium (111) system to the system Fermi energy.

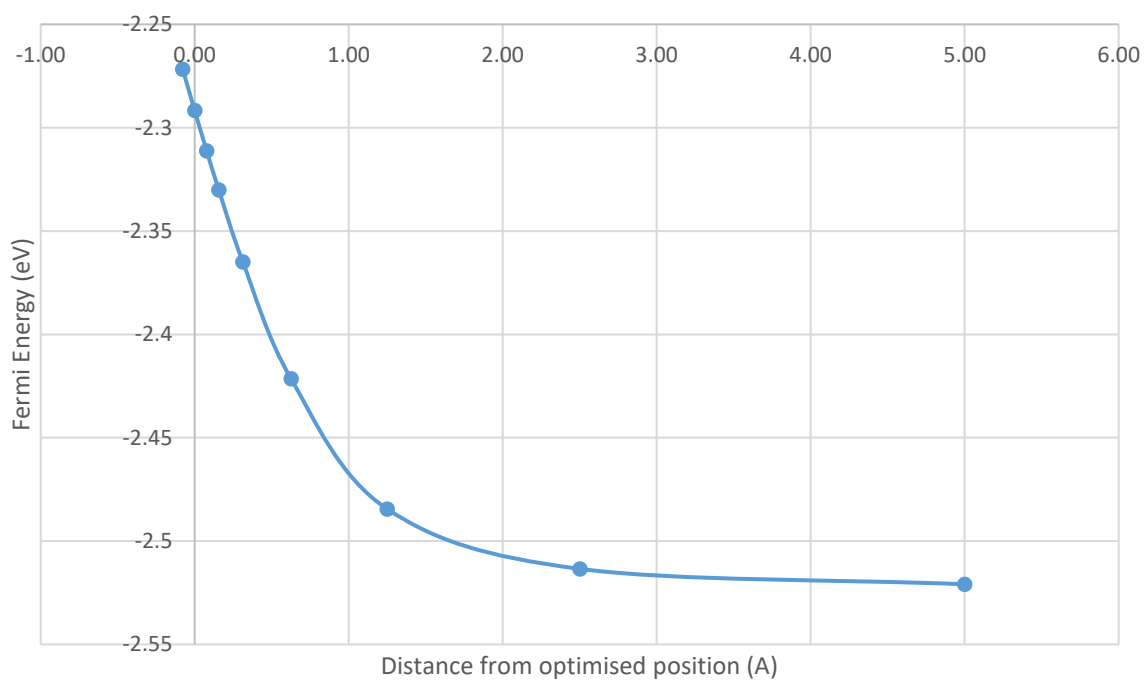

**Figure S4.** – The impact of the distance from the optimised position of the paracetamol molecule on the surface of the copper (111) system to the system Fermi energy.

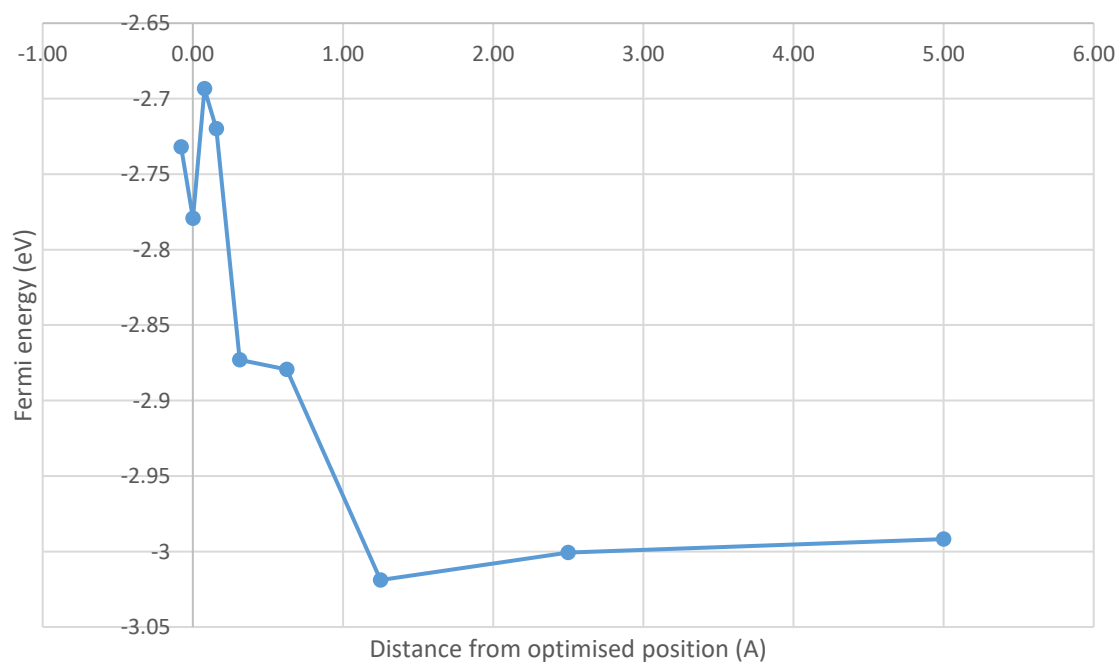

**Figure S5.** – The impact of the distance from the optimised position of the paracetamol molecule on the surface of the nickel (111) system to the system Fermi energy.

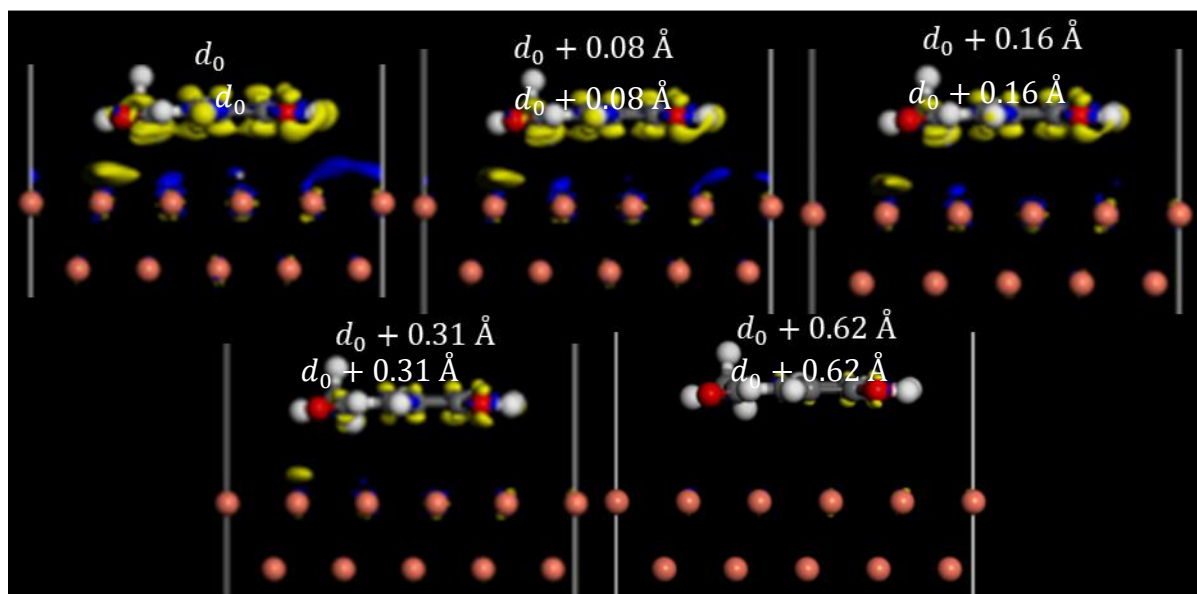

**Figure S6.** – Charge density difference iso surface of paracetamol on copper (111) surface at several distances. Side view. The geometry-optimised position of paracetamol is indicated by  $d_0$ . Iso value =  $7 \times 10^{-3}$  electron/Å<sup>3</sup>.

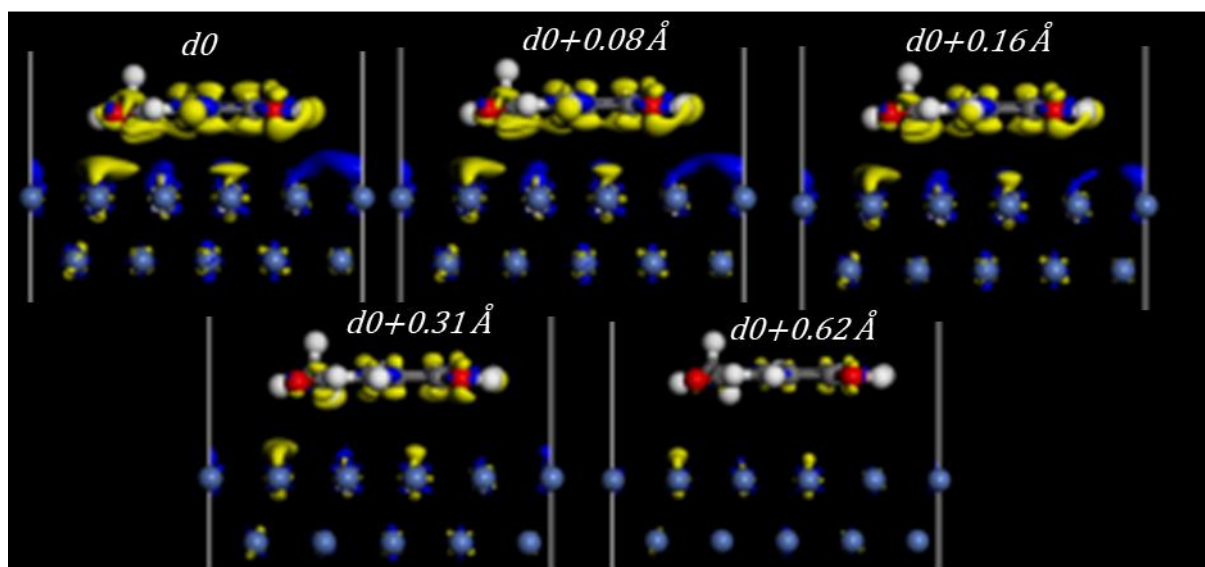

**Figure S7.** – Charge density difference iso surface of paracetamol on a nickel (111) surface at several distances. Side view. The geometry-optimised position of paracetamol is indicated by  $d_0$ . Iso value =  $7 \times 10^{-3}$  electron/Å<sup>3</sup>.
